# Supplementary material
Source: publisher site journal article supplement (https://www.dovepress.com/article/231555)
Supplement: Supplementary file 1 [file get_supplementary_file.php]

**Table S1** the 90 cerebral regions extracted from the AAL template.

| Index | Region | Abbreviation | MNI(L/R) |
| --- | --- | --- | --- |
| 1/2 | Precentral gyrus | PreCG | (-39,-6,51)/(41,-8,52) |
| 3/4 | Superior frontal gyrus, dorsolateral | SFGdor | (-18,35,42)/(22,31,44) |
| 5/6 | Superior frontal gyrus, orbital part | ORBsup | (-17,47,-13)/(18,48,-14) |
| 7/8 | Middle frontal gyrus | MFG | (-33,33,35)/(38,33,34) |
| 9/10 | Middle frontal gyrus, orbital part | ORBmid | (-31,50,-10)/(33,53,-11) |
| 11/12 | Inferior frontal gyrus, opercular part | IFGoperc | (-48,13,19)/(50,15,21) |
| 13/14 | Inferior frontal gyrus, triangular part | IFGtriang | (-46,30,14)/(50,30,14) |
| 15/16 | Inferior frontal gyrus, orbital part | ORBinf | (-36,31,-12)/(41,32,-12) |
| 17/18 | Rolandic operculum | ROL | (-47,-8,14)/(53,-6,15) |
| 19/20 | Supplementary motor area | SMA | (-5,5,61)/(9,0,62) |
| 21/22 | Olfactory cortex | OLF | (-8,15,-11)/(10,16,-11) |
| 23/24 | Superior frontal gyrus, medial | SFGmed | (-5,49,31)/(9,51,30) |
| 25/26 | Superior frontal gyrus, medial orbital | ORBsupmed | (-5,54,-7)/(8,52,-7) |
| 27/28 | Gyrus rectus | REC | (-5,37,-18)/(8,36,-18) |
| 29/30 | Insula | INS | (-35,7,3)/(39,6,2) |
| 31/32 | Anterior cingulate and paracingulate gyri | ACG | (-4,35,14)/(8,37,16) |
| 33/34 | Median cingulate and paracingulate gyri | DCG | (-5,-15,42)/(8,-9,40) |
| 35/36 | Posterior cingulate gyrus | PCG | (-5,-43,25)/(7,-42,22) |
| 37/38 | Hippocampus | HIP | (-25,-21,-10)/(29,-20,-10) |
| 39/40 | Parahippocampal gyrus | PHG | (-21,-16,-21)/(25,-15,-20) |
| 41/42 | Amygdala | AMYG | (-23,-1,-17)/(27,1,-18) |
| 43/44 | Calcarine fissure and surrounding cortex | CAL | (-7,-79,6)/(16,-73,9) |
| 45/46 | Cuneus | CUN | (-6,-80,27)/(14,-79,28)  (-6,-80,27)/(14,-79,28)  5/46 |
| 47/48 | Lingual gyrus | LING | (-15,-68,-5)/(16,-67,-4)  7/48 |
| 49/50 | Superior occipital gyrus | SOG | (-17,-84,28)/(24,-81,31) |
| 51/52 | Middle occipital gyrus | MOG | (-32,-81,16)/(37,-80,19) |
| 53/54 | Inferior occipital gyrus | IOG | (-36,-78,-8)/(38,-82,-8) |
| 55/56 | Fusiform gyrus | FFG | (-31,-40,-20)/(34,-39,-20) |
| 57/58 | Postcentral gyrus | PoCG | (-42,-23,49)/(41,-25,53) |
| 59/60 | Superior parietal gyrus | SPG | (-23,-60,59)/(26,-59,62) |
| 61/62 | Inferior parietal gyrus | IPL | (-43,-46,47)/(46,-46,50) |
| 63/64 | Supramarginal gyrus | SMG | (-56,-34,30)/(58,-32,34) |
| 65/66 | Angular gyrus | ANG | (-44,-61,36)/(46,-60,39) |
| 67/68 | Precuneus | PCUN | (-8,-25,70)/(7,-32,68) |
| 69/70 | Paracentral lobule | PCL | (-7,-56,48)/(10,-56,44) |
| 71/72 | Caudate nucleus | CAU | (-11,11,9)/(15,12,9) |
| 73/74 | Lenticular nucleus, putamen | PUT | (-24,4,2)/(28,5,2) |
| 75/76 | Lenticular nucleus, pallidum | PAL | (-18,0,0)/(21,0,0) |
| 77/78 | Thalamus | THA | (-11,-18,8)/(13,-18,8) |
| 79/80 | Heschl gyrus | HES | (-42,-19,10)/(46,-17,10) |
| 81/82 | Superior temporal gyrus | STG | (-53,-21,7)/(58,-22,7) |
| 83/84 | Temporal pole: superior temporal gyrus | TPOsup | (-40,15,-20)/(48,15,-17) |
| 85/86 | Middle temporal gyrus | MTG | (-56,-34,-2)/(57,-37,-1) |
| 87/88 | Temporal pole: middle temporal gyrus | TPOmid | (-36,15,-34)/(44,15,-32) |
| 89/90 | Inferior temporal gyrus | ITG | (-50,-28,-23)/(54,-31,-22) |
